# Supplementary material
Source: MDPI journal article supplement (https://www.mdpi.com/1999-4907/13/9/1506)
Supplement: s1 [file s1]

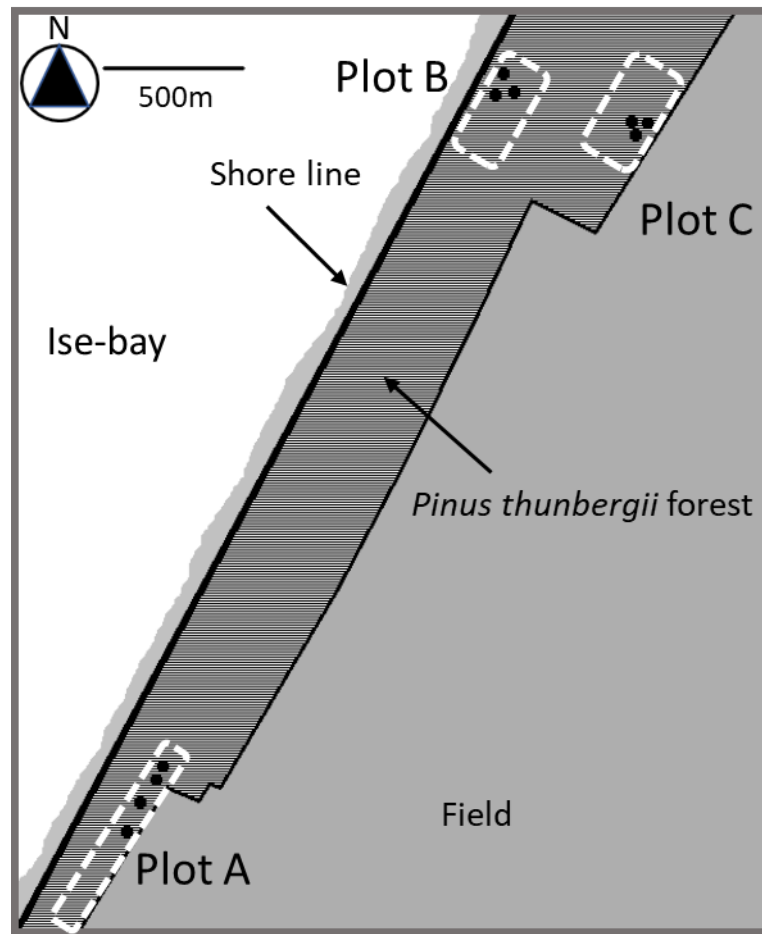

**Figure S1.** Location of experimental plots A–C in a coastal *Pinus thunbergii* forest.

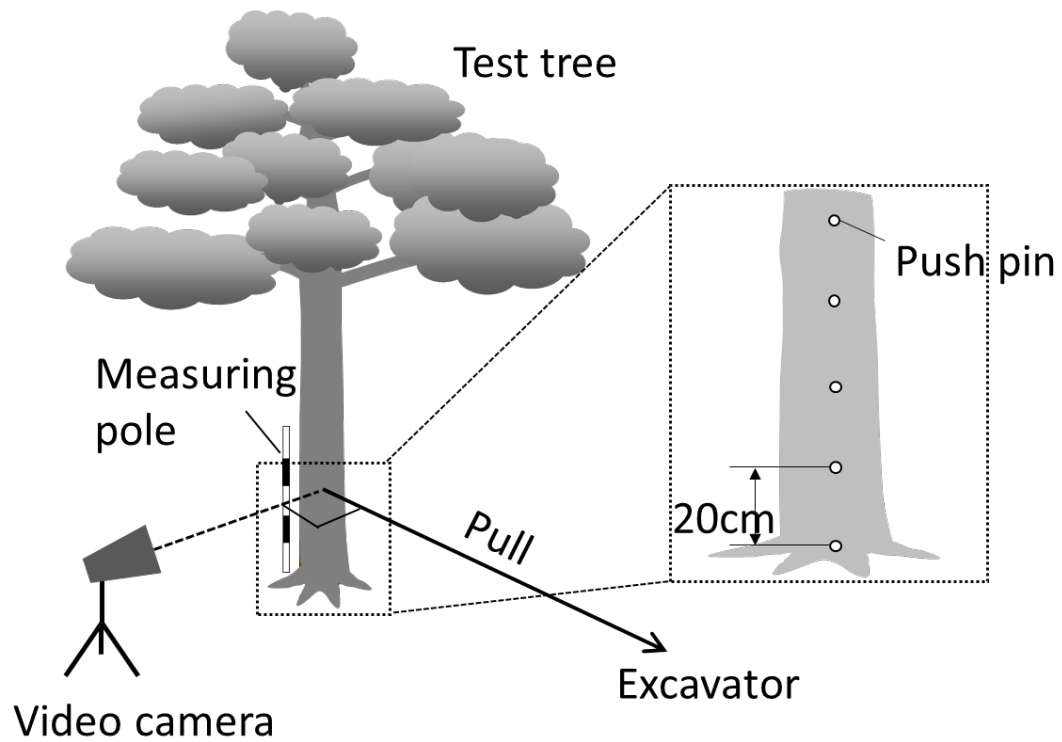

**Figure S2.** Video shooting method to measure the depth at the center point of rotation (Dcp) in *P. thunbergii* trees in a tree-pulling experiment.

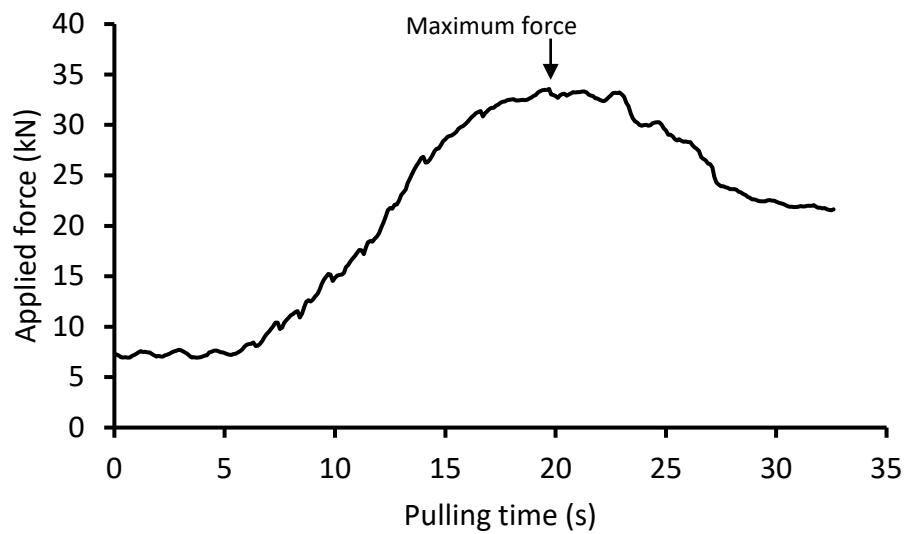

**Figure S3.** Example of change in applied force with the pulling time in a *P. thunbergii* tree during the pulling experiment (ex. plotA-1).

**Table S1.** Characteristics of *Pinus thunbergii* trees and soils at Plot A, B and C (min–max values or mean values  $\pm$  SE).

|                                            | Plot A                                     | Plot B                                   | Plot C                                       |
|--------------------------------------------|--------------------------------------------|------------------------------------------|----------------------------------------------|
| Distance from the shoreline (m)            | 188–199                                    | 150–270 <sup>c</sup>                     | 620–740 <sup>c</sup>                         |
| Elevation above sea level (m)              | 0.88–1.42 <sup>a,b</sup>                   | 0.48–1.61 <sup>c</sup>                   | 1.88–2.83 <sup>c</sup>                       |
| Ground water table depth <sup>d</sup> (cm) | 175 $\pm$ 8.7 <sup>b</sup>                 | 94 $\pm$ 28 <sup>c</sup>                 | >240 <sup>c</sup>                            |
| Soil water content <sup>e</sup> (%)        |                                            |                                          |                                              |
| 0–10 cm depth                              | n.d.                                       | 14.8 $\pm$ 2.9 <sup>c</sup>              | 6.8 $\pm$ 1.0 <sup>c</sup>                   |
| 20–30 cm depth                             | 2.1–3.1 <sup>b</sup>                       | 5.8 $\pm$ 0.3 <sup>c</sup>               | 2.5 $\pm$ 0.3 <sup>c</sup>                   |
| Canopy layer tree species                  | <i>P. thunbergii</i>                       | <i>P. thunbergii</i>                     | <i>P. thunbergii</i>                         |
| <i>P. thunbergii</i> trees <sup>f</sup>    |                                            |                                          |                                              |
| DBH (cm)                                   | 17.2 $\pm$ 0.9                             | 15.4 $\pm$ 1.1 <sup>c</sup>              | 16.4 $\pm$ 1.2 <sup>c</sup>                  |
| H (m)                                      | 9.8 $\pm$ 0.2                              | 5.5 $\pm$ 0.3 <sup>c</sup>               | 10.2 $\pm$ 0.7 <sup>c</sup>                  |
| Crown width (m)                            | 3.4 $\pm$ 0.2                              | 3.8 $\pm$ 0.3 <sup>c</sup>               | 3.2 $\pm$ 0.2 <sup>c</sup>                   |
| Distance (m)                               |                                            |                                          |                                              |
| to adjacent <i>P. thunbergii</i>           | n.d.                                       | 4.1 $\pm$ 0.6 <sup>c</sup>               | 2.3 $\pm$ 0.3 <sup>c</sup>                   |
| Density (no. ha <sup>-1</sup> )            | 100–200                                    | 200–400 <sup>c</sup>                     | 400–1000 <sup>c</sup>                        |
| Understory species                         | <i>Pittosporum tobira</i> <sup>b</sup>     | <i>Robinia pseudoacacia</i> <sup>c</sup> | <i>Quercus phillyraeoides</i> <sup>c</sup>   |
|                                            | <i>Quercus phillyraeoides</i> <sup>b</sup> | <i>Pittosporum tobira</i> <sup>c</sup>   | <i>Cinnamomum camphora</i> <sup>c</sup>      |
|                                            | <i>Rhus javanica</i>                       |                                          | <i>Toxicodendron sylvestric</i> <sup>c</sup> |
|                                            | var. <i>chinensis</i> <sup>b</sup>         |                                          |                                              |

DBH: stem diameter at breast height.

H: tree height.

n.d.: not determined.

a Data from Todo et al. [42].

b Data from Tanaka et al. [41].

c Data from Todo et al. [7] and Hirano et al. [8].

d Plot A ( $n = 3$ ), Plot B ( $n = 3$ ), Plot C ( $n = 1$ ).

e Plot A (number of data unknown), Plot B ( $n = 13$ ), Plot C ( $n = 14$ ).

f Plot A ( $n = 13$ ), Plot B ( $n = 17$ ), Plot C ( $n = 24$ ).

## References

7. Todo, C.; Tokoro, C.; Yamase, K.; Tanikawa, T.; Ohashi, M.; Ikeno, H.; Dannoura, M.; Miyatani, K.; Doi, R.; Hirano, Y. Sta-bility of *Pinus thunbergii* between Two Contrasting Stands at Differing Distances from the Coastline. *For. Ecol. Manag.* 2019, 431, 44–53. <https://doi.org/10.1016/j.foreco.2018.05.040>.
8. Hirano, Y.; Todo, C.; Yamase, K.; Tanikawa, T.; Dannoura, M.; Ohashi, M.; Doi, R.; Wada, R.; Ikeno, H. Quantification of the Contrasting Root Systems of *Pinus thunbergii* in Soils With Different Groundwater Levels in a Coastal Forest in Japan. *Plant Soil.* 2018, 426, 327–337. <https://doi.org/10.1007/s11104-018-3630-9>.
41. Tanaka, J.; Nakazawa, H.; Satou, T. Case Study of Root Systems Growth of *Pinus thunbergii* Parlature and Groundwater Level in the Nishinohama Coastal Forest, Tahara City, Aichi Prefecture. *J. Jpn. Soc. Re-veget Tec.* 2017, 43, 298–301. (in Japanese). <https://doi.org/10.7211/jjsrt.43.298>.
42. Todo, C.; Ikeno, H.; Yamase, K.; Tanikawa, T.; Ohashi, M.; Dannoura, M.; Kimura, T.; Hirano, Y. Reconstruction of Conifer Root Systems Mapped With Point Cloud Data Obtained by 3D Laser Scanning Compared With Manual Measurement. *Forests.* 2021, 12, 1117. <https://doi.org/10.3390/f12081117>.
